# Supplementary material for: Interplay and cooperation between SREBF1 and master transcription factors regulate lipid metabolism and tumor-promoting pathways in squamous cancer
Source: PubMed Central journal article supplement (PMC8285542; doi:10.1038/s41467-021-24656-x), 2021-07-16
Supplement: 41467_2021_24656_MOESM3_ESM.pdf [file 41467_2021_24656_MOESM3_ESM.pdf]

## **Description of Additional Supplementary Files**

**Supplementary Data 1.** The genes positively or negatively correlated with TP63 in SCC

**Supplementary Data 2.** 4C-Seq using SREBF1 promoter as the bait in TE5 cells

**Supplementary Data 3.** Source data of lipidomics

**Supplementary Data 4.** The top 15 most significantly enriched motifs by sequence motif enrichment analysis performed in separately promoter and distal regions for each group peaks

**Supplementary Data 5.** The exact P values of all statistical tests
